# Supplementary material
Source: publisher figshare collection journal article supplement (https://frontiersin.figshare.com/ndownloader/files/12981422)
Supplement: Supplementary file 1 [file 12981422]

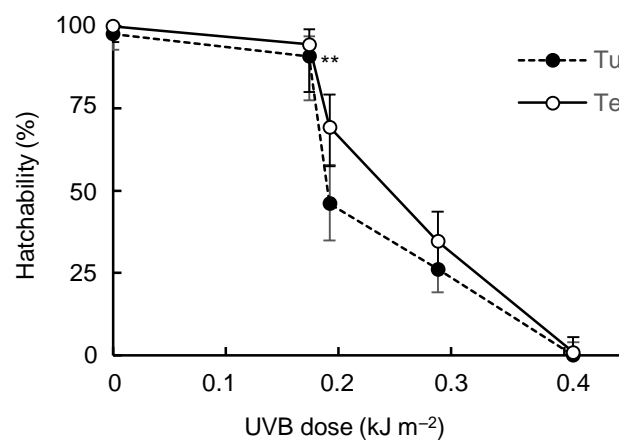

Figure S2. Dose–response relationship following UVB exposure for eggs of *N. californicus* fed on *T. urticae* (Tu) and tea pollen (Te). Vertical lines above and below each plot indicate the 95 % confidence interval. Experiments were performed triplicated excepting 0.174 kJ m<sup>-2</sup> (once) and 0.192 kJ m<sup>-2</sup> (twice). Number of eggs used for a batch was  $39.5 \pm 7.7$ .
